# Supplementary material for: Genomic Identification of CCCH-Type Zinc Finger Protein Genes Reveals the Role of HuTZF3 in Tolerance of Heat and Salt Stress of Pitaya (Hylocereus polyrhizus)
Source: MDPI journal article supplement (doi:10.3390/ijms24076359), 2023-03-28
Supplement: s1 [file s1]

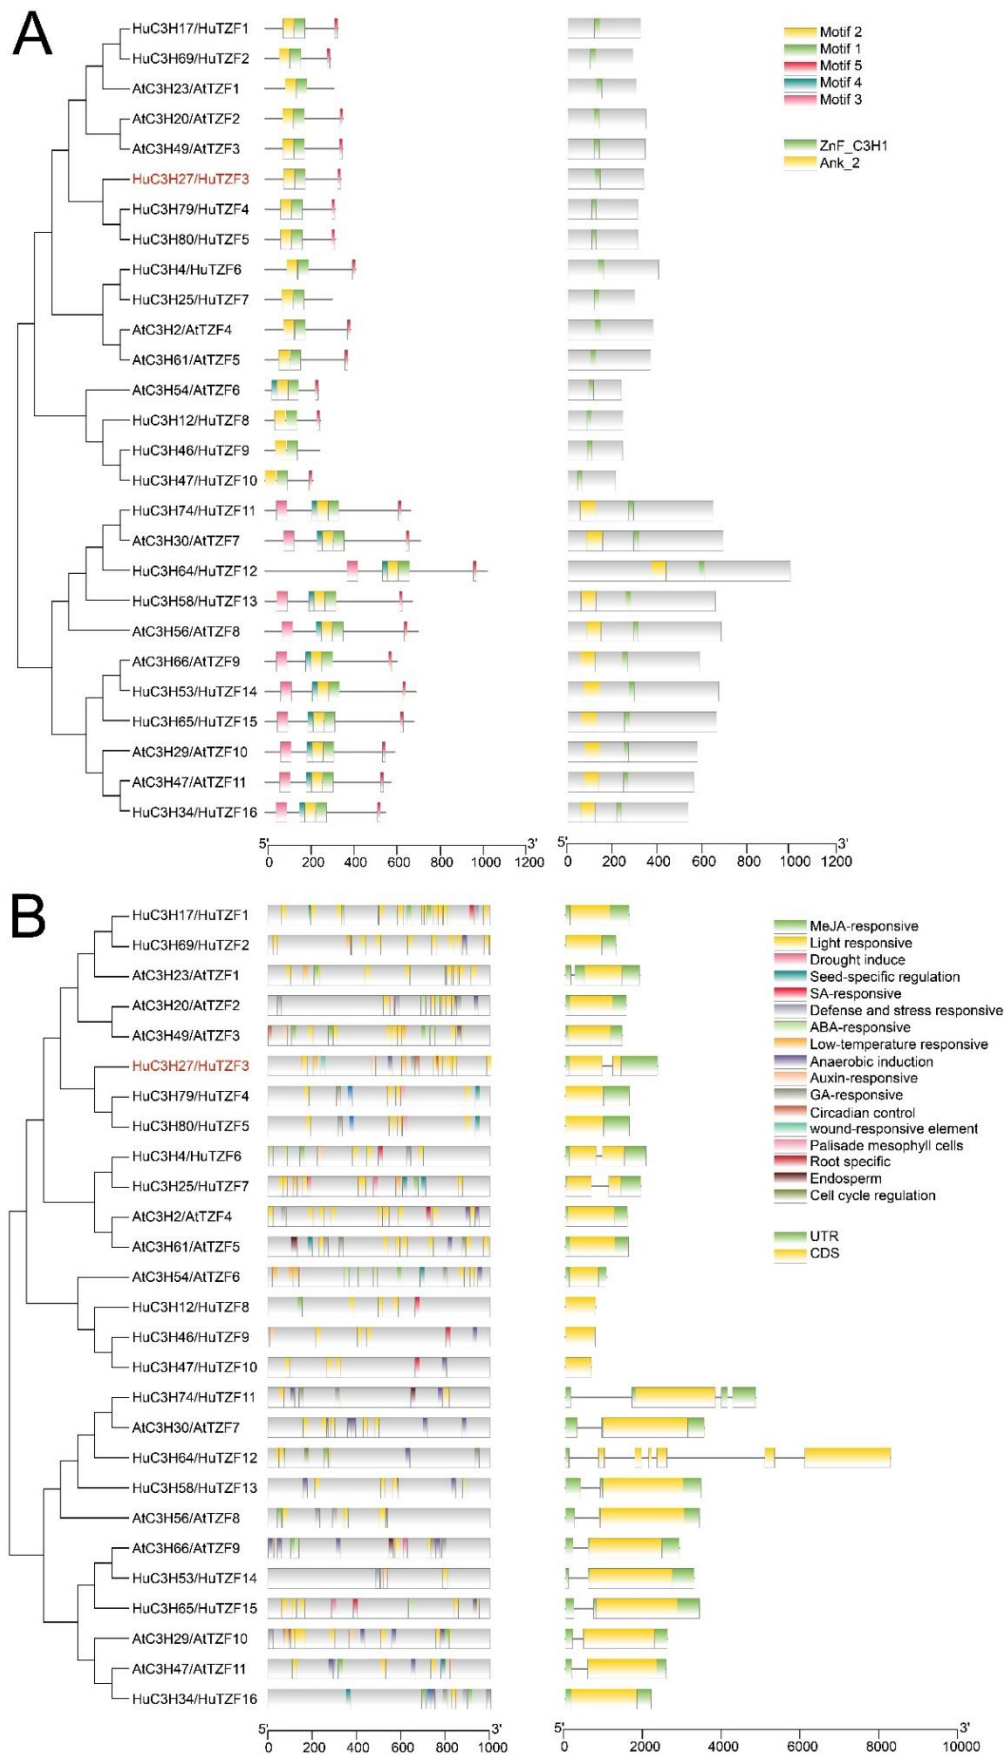

**Supplementary Figure S1.** Phylogenetic analysis, conserved motifs, conserved

domains, *cis*-acting regulatory elements in promoters, and gene structure of subfamily IX in the *CCCH* genes. **(A)** Phylogenetic tree was analyzed by MEGA11, conserved motif by MEME and conserved domain by NCBI conserved domains database (CDD). **(B)** *cis*-elements in promoter by Plant Care and gene structure by TBtools. Visualized by TBtools.

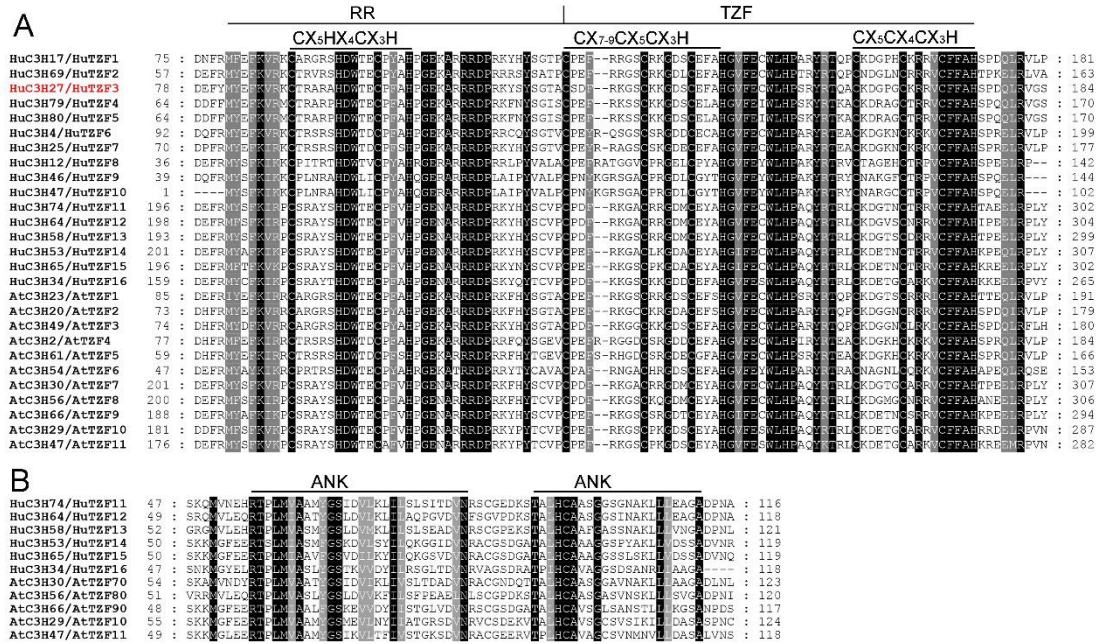

**Supplementary Figure S2.** Sequence analysis of subfamily IX in pitaya and *Arabidopsis*. Amino acid sequence alignment of the zinc finger motifs (**A**) and ankyrin repeat (ANK) domains (**B**) in the subfamily IX.
