# Supplementary material for: Genomic Identification of CCCH-Type Zinc Finger Protein Genes Reveals the Role of HuTZF3 in Tolerance of Heat and Salt Stress of Pitaya (Hylocereus polyrhizus)
Source: MDPI journal article supplement (doi:10.3390/ijms24076359), 2023-03-28
Supplement: s1 [file s1]

**Supplementary Table S1.** List of identified *HuCCCH* genes in pitaya along with their chromosomal locations and proteomic information

| Gene name | Accession number | Chrom | Chr start | Chr end   | Protein/AA | pI   | MW(Da)    |
|-----------|------------------|-------|-----------|-----------|------------|------|-----------|
| HuC3H1    | HU01G00226.1     | chr01 | 2782537   | 2787570   | 696        | 5.67 | 77095.87  |
| HuC3H2    | HU01G00905.1     | chr01 | 22038524  | 22042315  | 319        | 7.19 | 50282.03  |
| HuC3H3    | HU01G01005.1     | chr01 | 29390111  | 29399239  | 881        | 8.08 | 101955.37 |
| HuC3H4    | HU01G01125.1     | chr01 | 44553152  | 44555195  | 417        | 6.73 | 45921.28  |
| HuC3H5    | HU01G01231.1     | chr01 | 58827319  | 58864270  | 426        | 8.44 | 48226.21  |
| HuC3H6    | HU01G01390.1     | chr01 | 95239847  | 95242439  | 563        | 5.94 | 63730.67  |
| HuC3H7    | HU01G01629.1     | chr01 | 115446115 | 115449452 | 580        | 6.05 | 64701.97  |
| HuC3H8    | HU01G02324.1     | chr01 | 137196357 | 137203757 | 1397       | 6.13 | 151482.42 |
| HuC3H9    | HU01G02326.1     | chr01 | 137221973 | 137229370 | 1396       | 6.24 | 151511.49 |
| HuC3H10   | HU01G02363.1     | chr01 | 137681275 | 137693558 | 903        | 5.88 | 96962.8   |
| HuC3H11   | HU02G00985.1     | chr02 | 12433649  | 12444163  | 457        | 8.5  | 48343.21  |
| HuC3H12   | HU02G02007.1     | chr02 | 36884092  | 36884853  | 254        | 8.35 | 28754.36  |
| HuC3H13   | HU02G02106.1     | chr02 | 43435336  | 43457666  | 826        | 8.83 | 92438.58  |
| HuC3H14   | HU02G02269.1     | chr02 | 60362370  | 60366431  | 738        | 5.51 | 81746.19  |
| HuC3H15   | HU02G02494.1     | chr02 | 102551084 | 102554444 | 440        | 9.22 | 51005.03  |
| HuC3H16   | HU02G02669.1     | chr02 | 121734570 | 121744060 | 360        | 8.69 | 39780.29  |
| HuC3H17   | HU02G02936.1     | chr02 | 137672084 | 137673698 | 335        | 6.98 | 37616.11  |
| HuC3H18   | HU03G00163.1     | chr03 | 1509465   | 1524207   | 1657       | 4.89 | 179676.37 |
| HuC3H19   | HU03G00599.1     | chr03 | 5551758   | 5553940   | 259        | 9.15 | 28699.12  |
| HuC3H20   | HU03G00716.1     | chr03 | 6770502   | 6783097   | 1024       | 9.38 | 110505.44 |
| HuC3H21   | HU03G01444.1     | chr03 | 16767055  | 16775811  | 150        | 9.04 | 16591.74  |
| HuC3H22   | HU03G01511.1     | chr03 | 17698176  | 17704081  | 456        | 8.51 | 49097.26  |

---

|         |              |       |           |           |      |      |           |
|---------|--------------|-------|-----------|-----------|------|------|-----------|
| HuC3H23 | HU03G01615.1 | chr03 | 20388828  | 20393662  | 691  | 5.88 | 76411.24  |
| HuC3H24 | HU03G01805.1 | chr03 | 30188119  | 30191737  | 324  | 9.1  | 37911.65  |
| HuC3H25 | HU03G01941.1 | chr03 | 41390457  | 41392367  | 308  | 8.57 | 34082.34  |
| HuC3H26 | HU03G02096.1 | chr03 | 58672951  | 58692103  | 851  | 5.33 | 93357.47  |
| HuC3H27 | HU03G02697.1 | chr03 | 129790146 | 129792479 | 349  | 6.79 | 38127.4   |
| HuC3H28 | HU03G02771.1 | chr03 | 131771850 | 131775956 | 523  | 8.61 | 59187.1   |
| HuC3H29 | HU04G01184.1 | chr04 | 93322569  | 93329865  | 311  | 9.45 | 36188     |
| HuC3H30 | HU04G01477.1 | chr04 | 117282428 | 117306249 | 1390 | 6.18 | 155093.29 |
| HuC3H31 | HU04G01583.1 | chr04 | 120561665 | 120572864 | 346  | 6.38 | 37905     |
| HuC3H32 | HU04G01723.1 | chr04 | 123044963 | 123049093 | 459  | 6.38 | 37905     |
| HuC3H33 | HU05G00908.1 | chr05 | 60062037  | 60072211  | 2137 | 8.69 | 234990.16 |
| HuC3H34 | HU05G01448.1 | chr05 | 112291442 | 112293611 | 554  | 8.45 | 60515.27  |
| HuC3H35 | HU05G01720.1 | chr05 | 119995504 | 119996669 | 295  | 8.66 | 32825.72  |
| HuC3H36 | HU05G01794.1 | chr05 | 120967284 | 120978221 | 948  | 7.1  | 102543.87 |
| HuC3H37 | HU05G02078.1 | chr05 | 125253402 | 125257593 | 1245 | 5.42 | 131570.17 |
| HuC3H38 | HU06G00107.1 | chr06 | 1077446   | 1088794   | 1779 | 6.08 | 193654.93 |
| HuC3H39 | HU06G00645.1 | chr06 | 7229598   | 7231022   | 278  | 8.62 | 30810.38  |
| HuC3H40 | HU06G00733.1 | chr06 | 8466308   | 8477608   | 219  | 8.62 | 30810.38  |
| HuC3H41 | HU06G01113.1 | chr06 | 19349432  | 19355056  | 748  | 6.33 | 80783.2   |
| HuC3H42 | HU06G01201.1 | chr06 | 24971234  | 24977197  | 748  | 6.33 | 80783.2   |
| HuC3H43 | HU06G01678.1 | chr06 | 89559418  | 89578867  | 1787 | 6.33 | 80783.2   |
| HuC3H44 | HU06G01752.1 | chr06 | 98703880  | 98738621  | 548  | 8.31 | 58986.17  |
| HuC3H45 | HU06G02044.1 | chr06 | 115376484 | 115383257 | 489  | 7.91 | 54869.83  |
| HuC3H46 | HU06G02348.1 | chr06 | 120439699 | 120440451 | 251  | 8.94 | 28205.89  |
| HuC3H47 | HU06G02369.1 | chr06 | 121061664 | 121062317 | 218  | 9.15 | 24522.97  |

---

|         |              |       |           |           |      |      |           |
|---------|--------------|-------|-----------|-----------|------|------|-----------|
| HuC3H48 | HU06G02465.1 | chr06 | 123164262 | 123171862 | 440  | 7.92 | 47779.15  |
| HuC3H49 | HU07G00096.1 | chr07 | 1020304   | 1029731   | 331  | 6.62 | 37685.93  |
| HuC3H50 | HU07G01420.1 | chr07 | 82417745  | 82449760  | 1019 | 6.16 | 115469.56 |
| HuC3H51 | HU07G01781.1 | chr07 | 104265779 | 104270496 | 435  | 6.16 | 47125.81  |
| HuC3H52 | HU07G01923.1 | chr07 | 108062108 | 108064435 | 428  | 9.57 | 49121.93  |
| HuC3H53 | HU07G02156.1 | chr07 | 111445768 | 111449028 | 695  | 5.91 | 75130.21  |
| HuC3H54 | HU07G02173.1 | chr07 | 111580379 | 111584103 | 378  | 6.92 | 44330.79  |
| HuC3H55 | HU08G00286.1 | chr08 | 9331386   | 9336277   | 565  | 6.27 | 63747.02  |
| HuC3H56 | HU08G00718.1 | chr08 | 65667001  | 65677438  | 385  | 8.11 | 41424.03  |
| HuC3H57 | HU08G01111.1 | chr08 | 87952373  | 87959381  | 532  | 5.57 | 59519.87  |
| HuC3H58 | HU08G01200.1 | chr08 | 92148249  | 92151683  | 679  | 6.29 | 73956.25  |
| HuC3H59 | HU08G01222.1 | chr08 | 92763966  | 92767848  | 695  | 5.95 | 76319.08  |
| HuC3H60 | HU08G01335.1 | chr08 | 94571394  | 94576990  | 421  | 8.61 | 46124.01  |
| HuC3H61 | HU08G01341.1 | chr08 | 94610342  | 94615933  | 381  | 7.54 | 41692.73  |
| HuC3H62 | HU08G01831.1 | chr08 | 100435137 | 100445435 | 470  | 5.58 | 52093.41  |
| HuC3H63 | HU08G01864.1 | chr08 | 100973028 | 100977131 | 337  | 8    | 37476.92  |
| HuC3H64 | HU08G01870.1 | chr08 | 101037964 | 101046195 | 1025 | 6.48 | 113134.21 |
| HuC3H65 | HU09G00164.1 | chr09 | 1738493   | 1741888   | 685  | 5.98 | 74254.45  |
| HuC3H66 | HU09G00410.1 | chr09 | 9585879   | 9587969   | 352  | 8.96 | 38762.8   |
| HuC3H67 | HU09G00531.1 | chr09 | 18066434  | 18073740  | 470  | 8.37 | 49606.62  |
| HuC3H68 | HU09G00811.1 | chr09 | 66115372  | 66123221  | 369  | 5.42 | 41890.88  |
| HuC3H69 | HU09G01465.1 | chr09 | 100270044 | 100271321 | 300  | 8.03 | 33742.94  |
| HuC3H70 | HU09G01797.1 | chr09 | 105100988 | 105105980 | 293  | 9.41 | 30369.39  |
| HuC3H71 | HU09G01798.1 | chr09 | 105107351 | 105112336 | 295  | 9.43 | 30606.69  |
| HuC3H72 | HU10G00596.1 | chr10 | 6677862   | 6681081   | 462  | 7.19 | 50282.03  |

---

|         |              |       |          |          |     |      |          |
|---------|--------------|-------|----------|----------|-----|------|----------|
| HuC3H73 | HU10G00654.1 | chr10 | 7593435  | 7596632  | 358 | 7.65 | 39024.68 |
| HuC3H74 | HU10G00982.1 | chr10 | 14636546 | 14641363 | 669 | 5.98 | 73108.37 |
| HuC3H75 | HU10G01534.1 | chr10 | 51609624 | 51623264 | 462 | 6.52 | 50262.78 |
| HuC3H76 | HU10G01711.1 | chr10 | 89627952 | 89632785 | 691 | 5.88 | 76411.24 |
| HuC3H77 | HU11G00058.1 | chr11 | 4866361  | 4873603  | 519 | 5.34 | 57585.26 |
| HuC3H78 | HU11G00295.1 | chr11 | 44042651 | 44070714 | 611 | 6.19 | 68037.18 |
| HuC3H79 | HU11G00518.1 | chr11 | 66200743 | 66202361 | 322 | 8.23 | 35741.22 |
| HuC3H80 | HU11G00519.1 | chr11 | 66400641 | 66402260 | 322 | 8.23 | 35741.22 |
| HuC3H81 | HU11G00912.1 | chr11 | 82816066 | 82834765 | 692 | 6.04 | 75457.76 |

---

**Supplementary Table S2.** Primer sequence information

| Primer name        | Sequence(5' to 3')                     | Notes                                  |
|--------------------|----------------------------------------|----------------------------------------|
| HuTZF3-OE-F-BglII  | TGACCATGGTAGATCTGATGATGATCGGAGAAACACAC | <i>HuTZF3</i> -OE vector construction  |
| HuTZF3-OE-R-SpeI   | CTTCTCCTTTACTAGTCTTGACGAGATCGGACACC    |                                        |
| HuTZF3-GFP-F-SpeI  | CGGACTAGTATGATGATCGGAGAAACACAC         | <i>HuTZF3</i> -GFP vector construction |
| HuTZF3-GFP-R-KpnI  | CGGGGTACCCTTGACGAGATCGGACACC           |                                        |
| In-RFP-UBP1-F-XbaI | CTGTACAAGTCTAGAATGCAGAGGTTGAAGCAGCA    | <i>RFP-UBP1</i> vector construction    |
| In-RFP-UBP1-R-SacI | GGGAAATTCGAGCTCTTACTGGTAGTACATGAGCTGCT |                                        |
| In-RFP-DCP2-F-XbaI | CTGTACAAGTCTAGAATGTCGGGCCTCCATCGA      | <i>RFP-DCP2</i> vector construction    |
| In-RFP-DCP2-R-SacI | GGGAAATTCGAGCTCTCAAGCTGAATTACCAGA      |                                        |
| HuTZF3-qRT-F       | CTGTTTCTTCGCCCCACTCG                   | qRT-PCR primers of <i>HuTZF3</i>       |
| HuTZF3-qRT-R       | TCGGCATGGATTTCACCTT                    |                                        |
| HuEF1-a-qRT-F      | CTGGACAAATCGGAAACGGC                   | qRT-PCR primers of <i>HuEF1-a</i>      |
| HuEF1-a-qRT-R      | ATGTCCCTCACAGCAAAACGA                  |                                        |
| AtACT2-qRT-F       | ATTACCCGATGGGCAAGTCA                   | qRT-PCR primers of <i>AtACT2</i>       |
| AtACT2-qRT-R       | TGCTCATACGGTCAGCGATAC                  |                                        |

**Supplementary Table S3.** The motifs and motifs logo of HuTZF were predicted by MEME search

| Name    | Consensus sequence                                                                   | Length (aa) | E-value   |
|---------|--------------------------------------------------------------------------------------|-------------|-----------|
| Motif 1 |    | 50          | 3.1e-582  |
| Motif 2 |    | 50          | 1.6e-555  |
| Motif 3 |  | 50          | 2.00E-110 |

Motif 4

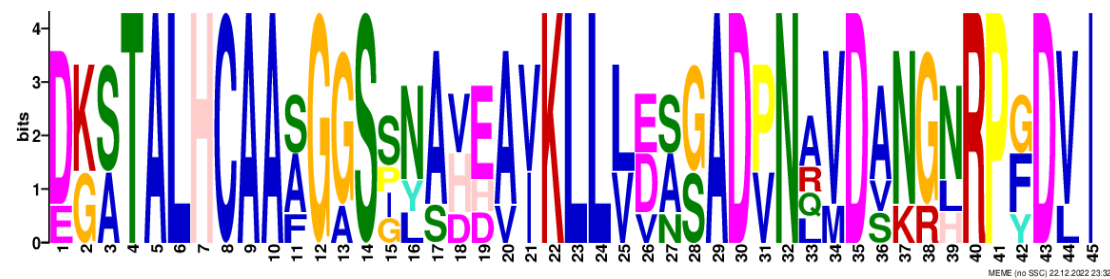

45

2.20E-65

Motif 5

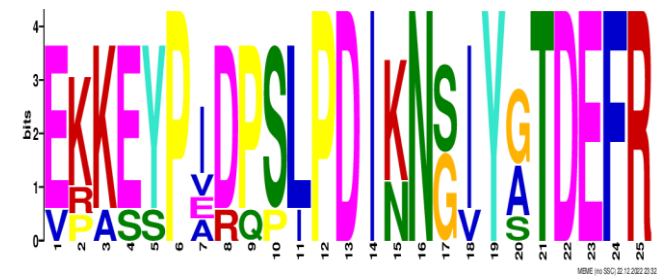

25

2.80E-64
